# Supplementary material for: Treatment cost and life expectancy of diffuse large B-cell lymphoma (DLBCL): a discrete event simulation model on a UK population-based observational cohort
Source: Springer Nature journal article supplement (doi:10.1007/s10198-016-0775-4), 2016-03-11
Supplement: MOESM1 [file 8773226]

# Treatment Cost and Life Expectancy of Diffuse Large B-Cell Lymphoma (DLBCL)

**A Discrete Event Simulation Model on a UK Population Based Observational Cohort**

Han-I Wang, Alexandra Smith, Eline Aas, Eve Roman, Simon Crouch, Cathy Burton, Russell Patmore

Corresponding Author: Han-I Wang

Epidemiology & Cancer Statistics Group (ECSG), Department of Health Sciences, Seebohm Rowntree Building, University of York, Heslington, York, YO10 5DD, UK

Tel: +44 (0)1904 321896

Han-i.wang@york.ac.uk

---

## Supplementary Tables

This Supplementary Appendix contains the information referred to the full version of this article.

**Supplementary Table 1: patient characteristics**

|                                      | Overall |         | Treated |         | Not treated |         |
|--------------------------------------|---------|---------|---------|---------|-------------|---------|
|                                      | N       | %       | N       | %       | N           | %       |
| Total                                | 271     | 100     | 217     | 100     | 54          | 100     |
| Age at diagnosis (years)             |         |         |         |         |             |         |
| Median (Q1-Q3)                       | 70      | (59-79) | 67      | (57-76) | 80          | (75-86) |
| Sex                                  |         |         |         |         |             |         |
| Male                                 | 153     | 56.5    | 127     | 58.5    | 26          | 48.2    |
| Female                               | 118     | 43.5    | 90      | 41.5    | 28          | 51.8    |
| International Prognostic Index (IPI) |         |         |         |         |             |         |
| Low (0-1)                            | 55      | 20.3    | 55      | 25.4    | -           | -       |
| Low-Intermediate (2)                 | 43      | 15.9    | 43      | 19.8    | -           | -       |
| Intermediate-High (3)                | 47      | 17.3    | 43      | 19.8    | 4           | 7.4     |
| High (4-5)                           | 78      | 28.8    | 54      | 24.9    | 24          | 44.4    |
| Not known                            | 48      | 17.7    | 22      | 10.1    | 26          | 48.2    |
| Age (years) >60                      |         |         |         |         |             |         |
| Yes                                  | 194     | 71.6    | 144     | 66.4    | 50          | 92.6    |
| No                                   | 77      | 28.4    | 73      | 33.6    | 4           | 7.4     |
| Stage                                |         |         |         |         |             |         |
| I                                    | 41      | 15.1    | 41      | 18.9    | -           | -       |
| II                                   | 39      | 14.4    | 37      | 17.1    | 2           | 3.7     |
| III                                  | 33      | 12.2    | 32      | 14.7    | 1           | 1.8     |
| IV                                   | 132     | 48.7    | 102     | 47.0    | 30          | 55.6    |
| Not fully staged                     | 26      | 9.6     | 5       | 2.3     | 21          | 38.9    |
| Extranodal Site >1                   |         |         |         |         |             |         |
| Yes                                  | 89      | 32.8    | 69      | 31.8    | 20          | 37.0    |
| No                                   | 156     | 57.6    | 142     | 65.4    | 14          | 26.0    |
| CT scan not done                     | 26      | 9.6     | 6       | 2.8     | 20          | 37.0    |
| Performance status (ECOG)            |         |         |         |         |             |         |
| 0                                    | 48      | 17.7    | 47      | 21.7    | 1           | 1.8     |
| 1                                    | 129     | 47.6    | 114     | 52.5    | 15          | 27.8    |
| >1                                   | 94      | 34.7    | 56      | 21.8    | 38          | 70.4    |
| Elevated Lactose Dehydrogenase (LDH) |         |         |         |         |             |         |
| Yes                                  | 158     | 58.3    | 129     | 54.4    | 29          | 53.7    |
| No                                   | 69      | 25.5    | 65      | 30.0    | 4           | 7.4     |
| Not measured                         | 44      | 16.2    | 23      | 10.6    | 21          | 38.9    |
| Status at 5 years after diagnosis    |         |         |         |         |             |         |
| Alive                                | 125     | 46.13   | 125     | 57.6    | -           | -       |
| Dead                                 | 146     | 53.87   | 92      | 42.4    | 54          | 100     |
| First line treatment                 |         |         |         |         |             |         |
| Standard                             | 161     | 59.41   | 162     | 74.7    | -           | -       |
| Stage IA                             | 25      | 9.23    | 25      | 11.5    | -           | -       |
| CNS prophylaxis                      | 23      | 8.49    | 23      | 10.6    | -           | -       |
| CNS involvement                      | 7       | 2.58    | 7       | 3.2     | -           | -       |
| Not treated                          | 54      | 19.9    | -       | -       | 54          | 100     |

**Supplementary Table 2: Parameters for first line treatment**

| Regimen                                        | CHOP    | R-CHOP  | R-CVP  | CODOX-M/IVAC-R | IDARAM  | Radiotherapy only |
|------------------------------------------------|---------|---------|--------|----------------|---------|-------------------|
| Treatment type                                 |         |         |        |                |         |                   |
| Age ≤ 60                                       |         |         |        |                |         |                   |
| % stage IA                                     | 11      | 89      | 0      | 0              | 0       | 0                 |
| % CNS involvement                              | 0       | 20      | 0      | 20             | 60      | 0                 |
| % standard                                     | 4       | 96      | 0      | 0              | 0       | 0                 |
| Age 60-80                                      |         |         |        |                |         |                   |
| % stage IA                                     | 8       | 77      | 0      | 0              | 0       | 15                |
| % CNS involvement                              | 0       | 100     | 0      | 0              | 0       | 0                 |
| % standard                                     | 5       | 86      | 9      | 0              | 0       | 0                 |
| Age ≥ 80                                       |         |         |        |                |         |                   |
| % stage IA                                     | 0       | 100     | 0      | 0              | 0       | 0                 |
| % CNS involvement                              | 0       | 100     | 0      | 0              | 0       | 0                 |
| % standard                                     | 4       | 56      | 28     | 0              | 0       | 0                 |
| Standard number of cycles                      | 3 or 6  | 6 or 8  | 8      | 2              | 2       | 20 fractions      |
| % Achieved full cycles                         |         |         |        |                |         |                   |
| Age ≤ 60                                       | 67      | 85      | 0      | 100            | 100     | 100               |
| Age 60-80                                      | 20      | 76      | 44     | 100            | 100     | 80                |
| Age ≥ 80                                       | 0       | 50      | 28     | 0              | 0       | 50                |
| (1 <sup>st</sup> cycle) % treated as inpatient | 60      | 39      | 56     | 100            | 100     | 0                 |
| (1 <sup>st</sup> cycle) Average (SD) LOS       | 22 (12) | 11 (14) | 9 (7)  | 31 (34)        | 37 (15) | -                 |
| (1 <sup>st</sup> cycle) Min-Max of LOS         | 8-48    | 1-68    | 1-20   | 7-55           | 19-68   | -                 |
| (Subsequent cycles) % treated as inpatient     | 0       | 4       | 0      | 100            | 40      | 0                 |
| (Subsequent cycles) Average (SD) LOS           | 19 (10) | 9 (12)  | 10 (4) | 7 (2)          | 30 (12) | -                 |
| (Subsequent cycles) Min-Max of LOS             | 2-25    | 1-62    | 7-13   | 6-8            | 7-54    | -                 |
| Drug cost (per cycle/per fraction)             | £289    | £1,730  | £1,486 | £6,241         | £2,006  | £123              |

\* CHOP: cyclophosphamide, doxorubicin, vincristine and prednisolone

R-CHOP: cyclophosphamide, doxorubicin, vincristine and prednisolone + rituximab

R-CVP: cyclophosphamide, vincristine, prednisolone + rituximab

CODOX-M/IVAC-R: rituximab, cyclophosphamide, vincristine, doxorubicin, and methotrexate + rituximab, etoposide, ifosfamide and cytarabine

IDARAM: idarubicin, dexamethasone, cytarabine, methotrexate

CNS: central nervous system

LOS: length of stay

**Supplementary Table 3: Parameters for second line treatment**

| Regimen                                        | R-CHOP  | R-DHAP  | R-ESHAP | R-CVP               | R-GCVP              | CODOX-M/IVAC-R | IDARAM  | Radiotherapy only |
|------------------------------------------------|---------|---------|---------|---------------------|---------------------|----------------|---------|-------------------|
| Standard number of cycles                      | 3       | 3       | 3       | 6                   | 6                   | 2              | 2       | 20 fractions      |
| % Achieved full cycles                         |         |         |         |                     |                     |                |         |                   |
| Age ≤ 60                                       | 100     | 46      | 100     | 0                   | 0                   | 0              | 67      | 100               |
| Age 60-80                                      | 0       | 14      | 100     | 0                   | 0                   | 0              | 00      | 80                |
| Age ≥ 80                                       | 0       | 0       | 0       | 0                   | 0                   | 0              | 0       | 50                |
| (1 <sup>st</sup> cycle) % treated as inpatient | 33      | 39      | 100     | 0                   | 0                   | 100            | 100     | 0                 |
| (1 <sup>st</sup> cycle) Average (SD) LOS       | 4 (2)   | 11 (14) | 17 (15) | 11 (4)              | 12 (4)              | 31 (34)        | 37 (15) | -                 |
| (1 <sup>st</sup> cycle) Min-Max of LOS         | 2-6     | 1-68    | 6-28    | 2-15                | 2-14                | 7-55           | 19-68   | -                 |
| (Subsequent cycles) % treated as inpatient     | 25      | 4       | 100     | 0 <sup>†</sup>      | 0 <sup>†</sup>      | 100            | 40      | 0                 |
| (Subsequent cycles) Average (SD) LOS           | 20 (10) | 9 (12)  | 14 (9)  | 11 (4) <sup>†</sup> | 12 (4) <sup>†</sup> | 7 (2)          | 30 (12) | -                 |
| (Subsequent cycles) Min-Max of LOS             | 2-25    | 1-62    | 7-20    | 2-15 <sup>†</sup>   | 2-14 <sup>†</sup>   | 6-8            | 7-54    | -                 |
| Drug cost (per cycle/per fraction)             | £1,730  | £1,952  | £3,344  | £1,486              | £1,593              | £6,241         | £2,006  | £123              |

\* R-CHOP: cyclophosphamide, doxorubicin, vincristine and prednisolone + rituximab

R-DHAP: dexamethasone, cytarabine, cisplatin + rituximab

R-ESHAP: etoposide, methylprednisolone, cytarabine, cisplatin + rituximab

R-CVP: cyclophosphamide, vincristine, prednisolone + rituximab

R-GCVP: gemcitabine, cyclophosphamide, vincristine, prednisolone + rituximab

CODOX-M/IVAC-R: rituximab, cyclophosphamide, vincristine, doxorubicin, and methotrexate + rituximab, etoposide, ifosfamide and cytarabine

IDARAM: idarubicin, dexamethasone, cytarabine, methotrexate

LOS: length of stay

<sup>†</sup> Assume the results are similar to the 1<sup>st</sup> cycle due to lack of data

**Supplementary Table 4: Parameters for third line treatment**

| Regimen                                        | MiniBEAM | Methotrexate |
|------------------------------------------------|----------|--------------|
| Standard number of cycles                      | 2        | 2            |
| % Achieved full cycles                         |          |              |
| Age ≤ 60                                       | 100      | 80           |
| Age 60-80                                      | 100      | 80           |
| Age ≥ 80                                       | 100      | 50           |
| (1 <sup>st</sup> cycle) % treated as inpatient | 70       | 100          |
| (1 <sup>st</sup> cycle) Average (SD) LOS       | 20 (8)   | 4 (1)        |
| (1 <sup>st</sup> cycle) Min-Max of LOS         | 9-26     | 4-4          |
| (Subsequent cycles) % treated as inpatient     | 67       | 100          |
| (Subsequent cycles) Average (SD) LOS           | 21 (4)   | 4 (1)        |
| (Subsequent cycles) Min-Max of LOS             | 9-30     | 4-4          |
| Drug cost (per cycle)                          | £446     | £861         |

\* MiniBEAM: carmustine, etoposide, cytarabine, melphalan  
 LOS: length of stay

**Supplementary Table 5: cost items**

| <b>Phases</b>                | <b>Cost items</b>                                                                                                                                                                                                                                  |
|------------------------------|----------------------------------------------------------------------------------------------------------------------------------------------------------------------------------------------------------------------------------------------------|
| <b>Diagnosis</b>             | Scans<br>Biopsies<br>ECG (Electrocardiography)<br>ECHO (Echocardiograph)<br>Blood tests                                                                                                                                                            |
| <b>First line treatment</b>  | Chemotherapy:<br>CHOP<br>CHOP/R<br>CVP/R<br>CODOX-M/IVAC-R<br>IDARAM<br>Radiotherapy only<br>Additional treatment:<br>Methotrexate<br>Radiotherapy<br>Supportive care:<br>G-CSF<br>Transfusion<br>Post chemotherapy imaging                        |
| <b>Second line treatment</b> | Chemotherapy:<br>CHOP/R<br>DHAP/R<br>ESHAP/R<br>GCVF/R<br>CVP/R<br>CODOX-M/IVAC-R<br>IDARAM<br>Radiotherapy only<br>Additional treatment:<br>Methotrexate<br>Radiotherapy<br>Supportive care:<br>G-CSF<br>Transfusion<br>Post chemotherapy imaging |
| <b>Third line treatment</b>  | Chemotherapy:<br>Mini-BEAM<br>Methotrexate<br>Supportive care:<br>G-CSF<br>Transfusion<br>Post chemotherapy imaging                                                                                                                                |
| <b>Follow up</b>             | Out-patient visits<br>Imaging if patients relapsed<br>Biopsies if patients relapsed                                                                                                                                                                |
| <b>End-of-life care</b>      | In-patient treatment<br>Out-patient visits                                                                                                                                                                                                         |

CHOP (cyclophosphamide, doxorubicin, vincristine and prednisone); R-CHOP (cyclophosphamide, doxorubicin, vincristine, prednisone and rituximab); R-CVP (cyclophosphamide, vincristine, prednisone and rituximab); CODOX-M/IVAC-R (cyclophosphamide, doxorubicin, vincristine, methotrexate/ifosfamide, etoposide, high dose cytarabine and rituximab); IDARAM (rituximab, idarubicin, dexamethasone, cytarabine and methotrexate); R-DHAP (dexamethasone, cytarabine, cisplatin and rituximab); R-ESHAP (etoposide, methylprednisolone, cytarabine, cisplatin and rituximab); MiniBEAM (carmustine, etoposide, cytarabine and melphalan).

**Supplementary Table 6: details of survival models**

|                                                   | Response after 1 <sup>st</sup> line treatment |               | Response after 2 <sup>nd</sup> line treatment |               | End of life care |            |
|---------------------------------------------------|-----------------------------------------------|---------------|-----------------------------------------------|---------------|------------------|------------|
|                                                   | Time to relapse                               | Time to death | Time to relapse                               | Time to death | Treated          | No treated |
| <b>Model type</b>                                 | Weibull                                       | Exponential   | Exponential                                   | Exponential   | lognormal        | Lognormal  |
| <b>Intercept</b>                                  | 10.73                                         | 12.31         | 32.36                                         | 8.49          | 5.76             | -0.20      |
| <b>Age</b>                                        | 0.09                                          | -0.05         | -0.1                                          | -             | -0.03            | 0.04       |
| <b>Time in treatment</b>                          | -0.009                                        | -             | -                                             | 0.01          | -                | -          |
| <b>Had autologous stem cell transplant or not</b> | -                                             | -             | -18.44                                        | -             | -                | -          |
| <b>Achieved full cycle of treatment or not</b>    | -                                             | -             | -2.5                                          | -             | -                | -          |
| <b>Shape parameter</b>                            | 0.60                                          | -             | -                                             | -             | -0.43            | 0.20       |

**Supplementary Table 7: Comparison table of simulated and relevant study results**

|                   | Country     | Price year | Patient age | Model approach            | Discount rate           | Time horizon | Regimen              | Mean Cost (2013 UK pound *) | Mean time | Simulated cost | Simulated time |
|-------------------|-------------|------------|-------------|---------------------------|-------------------------|--------------|----------------------|-----------------------------|-----------|----------------|----------------|
| Hornberger et al. | USA         | 2003       | >=60        | Markov                    | 3%                      | 5 year       | CHOP                 | \$7308 (£6394)              | 3.11 yrs  | £7,163         | 1.78 yrs       |
|                   |             |            |             |                           |                         |              | CHOP/R               | \$22430 (£19485)            | 4.15 yrs  | £20,831        | 3.52 yrs       |
| Johnston et al.   | Canada      | 2006       | >15         | Discrete event simulation | 3%                      | 15 year      | <60                  |                             |           |                |                |
|                   |             |            |             |                           |                         |              | CHOP                 | \$36765 (£22713)            | 7.7 yrs   | £14525         | 8.3 yrs        |
|                   |             |            |             |                           |                         |              | CHOP/R               | \$46337 (£28626)            | 8.3 yrs   | £26761         | 11.8 yrs       |
|                   |             |            |             |                           |                         |              | >60                  |                             |           |                |                |
|                   |             |            |             |                           |                         |              | CHOP                 | \$34968 (£21603)            | 4.5 yrs   | £7163          | 1.78 yrs       |
|                   |             |            |             |                           |                         |              | CHOP/R               | \$42892 (£26498)            | 6.2 yrs   | £20831         | 7.87 yrs       |
| Knight et al.     | UK          | 2004       | Unclear     | Markov                    | 6% cost<br>1.5% outcome | 15 year      | <60                  |                             |           |                |                |
|                   |             |            |             |                           |                         |              | CHOP                 | £7311 (£10016)              | 8.86 yrs  | £14525         | 8.3 yrs        |
|                   |             |            |             |                           |                         |              | CHOP/R               | £15181 (£20798)             | 9.90 yrs  | £26761         | 11.8 yrs       |
|                   |             |            |             |                           |                         |              | >60                  |                             |           |                |                |
|                   |             |            |             |                           |                         |              | CHOP                 | £5773 (£7909)               | 5.25 yrs  | £7163          | 1.78 yrs       |
|                   |             |            |             |                           |                         |              | CHOP/R               | £14456 (£19805)             | 6.23 yrs  | £20831         | 7.87 yrs       |
| Best et al.       | France      | 2003       | 60-80       | Markov                    | 3%                      | 15 year      | CHOP                 | €28782 (£28079)             | 4.84 yrs  | £8364          | 2.2 yrs        |
|                   |             |            |             |                           |                         |              | CHOP/R               | €41952 (£40927)             | 5.83 yrs  | £21596         | 8.58 yrs       |
| Groot et al.      | Netherlands | 2002       | unclear     | Markov                    | 4%                      | 15 year      | <60                  |                             |           |                |                |
|                   |             |            |             |                           |                         |              | CHOP                 | €27828 (£25360)             | 6.91 yrs  | £14525         | 8.3 yrs        |
|                   |             |            |             |                           |                         |              | CHOP/R               | €40171 (£36609)             | 7.74 yrs  | £26761         | 11.8 yrs       |
|                   |             |            |             |                           |                         |              | >60                  |                             |           |                |                |
|                   |             |            |             |                           |                         |              | CHOP                 | €26891 (£24506)             | 4.17 yrs  | £7163          | 1.78 yrs       |
|                   |             |            |             |                           |                         |              | CHOP/R               | €42751 (£38960)             | 5.14 yrs  | £20831         | 7.87 yrs       |
| Lee et al.        | Canada      | 2004       | 21-90       | Micro-costing             | 0%                      | -            | CHOP:                |                             |           |                |                |
|                   |             |            |             |                           |                         |              | 1 <sup>st</sup> line | \$12240 (£7043)             |           | £4625          |                |
|                   |             |            |             |                           |                         |              | Total                | \$35292 (£20307)            |           | £10461         |                |
|                   |             |            |             |                           |                         |              | CHOP/R               |                             |           |                |                |
|                   |             |            |             |                           |                         |              | 1 <sup>st</sup> line | \$33088 (£13897)            |           | £15862         |                |
|                   |             |            |             |                           |                         |              | Total                | \$47377 (£27261)            |           | £23043         |                |

\* All currencies were inflated and converted to 2013 UK sterling.
